# Supplementary material for: Centrosome Amplification Is a Potential Molecular Target in Paediatric Acute Lymphoblastic Leukemia
Source: MDPI journal article supplement (doi:10.3390/cancers15010154), 2022-12-27
Supplement: s1 [file s1]

# Centrosome Amplification Is a Potential Molecular Target in Paediatric Acute Lymphoblastic Leukemia

Meiyun Guo<sup>†</sup>, Jenna Rever<sup>†</sup>, Phuong N.U. Nguyen<sup>1</sup>, Neha M. Akella<sup>1</sup>, Gregor S.D. Reid<sup>1,2</sup>, and Christopher A. Maxwell<sup>1,2,\*</sup>.

<sup>1</sup> Department of Pediatrics, University of British Columbia, Vancouver, British Columbia, Canada.

<sup>2</sup> Michael Cuccione Childhood Cancer Research Program, British Columbia Children's Hospital Research, Vancouver, British Columbia, Canada.

\* Correspondence: [cmaxwell@bccchr.ca](mailto:cmaxwell@bccchr.ca)

<sup>†</sup> These authors contributed equally to this work.

## Supplementary Tables and Figures

**Supplementary Table S1.** Sex, subtype, and cytogenetic characterization of stem cells and pediatric B-ALL samples used in the study.

| Patient ID | Subtype     | Cytogenetics                                                                                          | Gender | Specimen type (%blast)  |
|------------|-------------|-------------------------------------------------------------------------------------------------------|--------|-------------------------|
| C03696     | Normal      | N/A                                                                                                   | F      | Stem cells (N/A)        |
| C03938     | Normal      | N/A                                                                                                   | M      | Stem cells (N/A)        |
| C02571     | Normal      | N/A                                                                                                   | M      | Stem cells (N/A)        |
| C01052     | Normal      | N/A                                                                                                   | M      | Stem cells (N/A)        |
| C02322     | Normal      | N/A                                                                                                   | M      | Stem cells (N/A)        |
| c00652     | Re, HyperD  | 54, XY + chr. X, Y, 9, 14, 21                                                                         | M      | Mononuclear cells (74%) |
| c00373     | Dx, Euploid | N/A                                                                                                   | M      | N/A (90%)               |
| c00023 r3  | Re, Euploid | t(1;5)(q21;q33), t(6;9)(p21;p13), rea(9),t(13;17)(q32;q21), t(15;16)(q24;q13) t(6;9)                  | M      | Whole bone marrow (90%) |
| c03632     | Dx, HypoD   | 28, XY                                                                                                | M      | Mononuclear cells (93%) |
| c00023 r2  | Re, Euploid | abnormal 2p, 3p, 5q, 6p, 14q, 16q, t(8;9) and t(13;17)                                                | M      | Whole bone marrow (96%) |
| c00115     | Re, Euploid | t(16;22), 37% of interphase nuclei have BCR/ABL dual fusion                                           | F      | Whole bone marrow (82%) |
| c00189     | Re, HyperD  | 49-52, XX + chr. X, X, 5, 8, 10, 21, 21 - chr. 20 t(2;8)(p13;p21), del(9)(p21.3), dup (17)(q24.2qter) | F      | Whole blood (93%)       |

|        |             |                                                                                                                                             |   |                         |
|--------|-------------|---------------------------------------------------------------------------------------------------------------------------------------------|---|-------------------------|
| c01818 | Re, Euploid | del(9)(p21.3)(CDKN2A-, cen9+)                                                                                                               | F | Mononuclear cells (98%) |
| c00269 | Re, Euploid | 47, XX + chr. 21c                                                                                                                           | F | Whole bone marrow (99%) |
| c02100 | Re, Euploid | t(9;22)(q34;q11.2)(ABL1+,BCR+,ABL1+)                                                                                                        | M | Mononuclear cells (54%) |
| c00118 | Re, Euploid | 47, XY + chr. 21c                                                                                                                           | M | Mononuclear cells (88%) |
| c00002 | Re, Euploid | dic(9;20) del(q9) t(2;5) ins(p5;6) del(q4,q6,q16) inv(3) t(11;15)                                                                           | M | Whole bone marrow (92%) |
| C00193 | Re, Euploid | dic(9;20) del(CDKN2A,IKFZ1)                                                                                                                 | M | Mononuclear cells (94%) |
| C03701 | Dx, HyperD  | 46,X, dup(X)(p21.1p22.3),t(4;9)(q21;q22),dup(6)(q12q14.2)[19]/46,XX[2].ish t(12;21)(p13;q22)(ETV6-,RUNX1+;RUNX1+,ETV6+),del(12)(p13)(ETV6-) | F | Mononuclear cells (94%) |
| C00189 | Re, Euploid | t(2;8)                                                                                                                                      | F | Whole blood (93%)       |
| C00125 | Dx, Euploid | del(9p)                                                                                                                                     | F | Whole bone marrow (92%) |

Supplementary Table S2. Species, karyotype, origin and cytogenetics of immortal cell-lines used in this study.

| Immortal cell lines | Species | Karyotype                 | Origin                                                      | Cytogenetics                                               |
|---------------------|---------|---------------------------|-------------------------------------------------------------|------------------------------------------------------------|
| 289                 | Mouse   | 43 (2N)<br>+ chr. 9,12,17 | Transgenic Eμ-ret+ mice [25], [26]                          | RFP/RET fusion gene                                        |
| RCH-ACV             | Human   | 43 - 50 (2N)<br>+ chr. 8  | Bone marrow cells taken at relapse from an 8-year-old girl  | t(1;19) (q23;p13.3)                                        |
| 380                 | Human   | 43 - 47 (2N)<br>- chr. 14 | Peripheral blood taken at relapse from a 15-year-old boy    | EBNA negative, t(8;14;18) (q24;q32;q21)                    |
| RS4;11              | Human   | 46 (2N)                   | Bone marrow cells taken at relapse from a 32-year-old women | t(4;11) (q21;q23), isochromosome for the long arm of chr.7 |

Supplementary Table S3. Centrosome clustering inhibitors and chemotherapy drugs used in this study.

| Inhibitor Type                  | Inhibitor            | Target     | Description                                                                                                                                            |
|---------------------------------|----------------------|------------|--------------------------------------------------------------------------------------------------------------------------------------------------------|
| Centrosome Clustering Inhibitor | AZ82 (21898) [20]    | KIFC1/HSET | KIFC1 cross-links adjacent microtubules and can focus microtubule minus ends at spindle poles.                                                         |
|                                 | Stattic (S7947) [22] | STAT3      | Stattic alters the SH2 domain of STAT3, which acts as transcription factor and also regulates the Stathmin-PLK1 cascade to reduce astral microtubules. |

|                      |                        |                  |                                                                                                                                                              |
|----------------------|------------------------|------------------|--------------------------------------------------------------------------------------------------------------------------------------------------------------|
| Chemotherapy<br>Drug | Doxorubicin<br>(D1515) | topoisomerase II | Doxorubicin is a widely used anticancer drug, which intercalates in DNA, inhibits topoisomerase II, generates free radicals and induces multipolar spindles. |
|                      | Paclitaxel<br>(T7402)  | Tubulin          | Paclitaxel inhibit microtubules dynamics, arrests cells in mitosis and induces multipolar spindles.                                                          |

21

**Supplementary Table S4.** Genes in TaqMan mouse immune panel.

22

| Gene Type                           | Gene symbol                                                                                                                                                                                                                                                                                                                                                                                                                                                                                                                                                                                            |
|-------------------------------------|--------------------------------------------------------------------------------------------------------------------------------------------------------------------------------------------------------------------------------------------------------------------------------------------------------------------------------------------------------------------------------------------------------------------------------------------------------------------------------------------------------------------------------------------------------------------------------------------------------|
| Endogenous control<br>genes         | 18S, Gapdh, Hprt1, Gusb                                                                                                                                                                                                                                                                                                                                                                                                                                                                                                                                                                                |
| Immune response<br>associated genes | Agtr2, Bax, Bcl2, Bcl2l1, C3, Ccl19, Ccl2, Ccl3, Ccl5, Ccr2, Ccr4, Ccr7, Cd19, Cd28, Cd34, Cd38, Cd3e, Cd4, Cd40, Cd40lg, Cd68, Cd80, Cd86, Cd8a, Csf1, Csf2, Csf3, Ctla4, Cxcl10, Cxcl11, Cxcr3, Cyp1a2, Cyp7a1, Edn1, Fas, FasL, Fn1, Gzmb, H2-Ea, H2-Eb1, Hmox1, Icos, Ifng, Ikbkb, Il10, Il12a, Il12b, Il13, Il15, Il17a, Il18, Il1a, Il1b, Il2, Il2ra, Il3, Il4, Il5, Il6, Il7, Il9, Lrp2, Lta, Nfkb1, Nfkb2, Nos2, Prf1, Ptgs2, Ptprc, Sele, Selp, Ski, Smad3, Smad7, Socs1, Socs2, Stat1, Stat3, Stat4, Stat6, Tbx21, Tgfb1, Tnf, Tnfrsf18, Vcam1, Vegfa, Ace, Icam1, Lif, Ly96, Nfatc3, Nfatc4 |

23

24

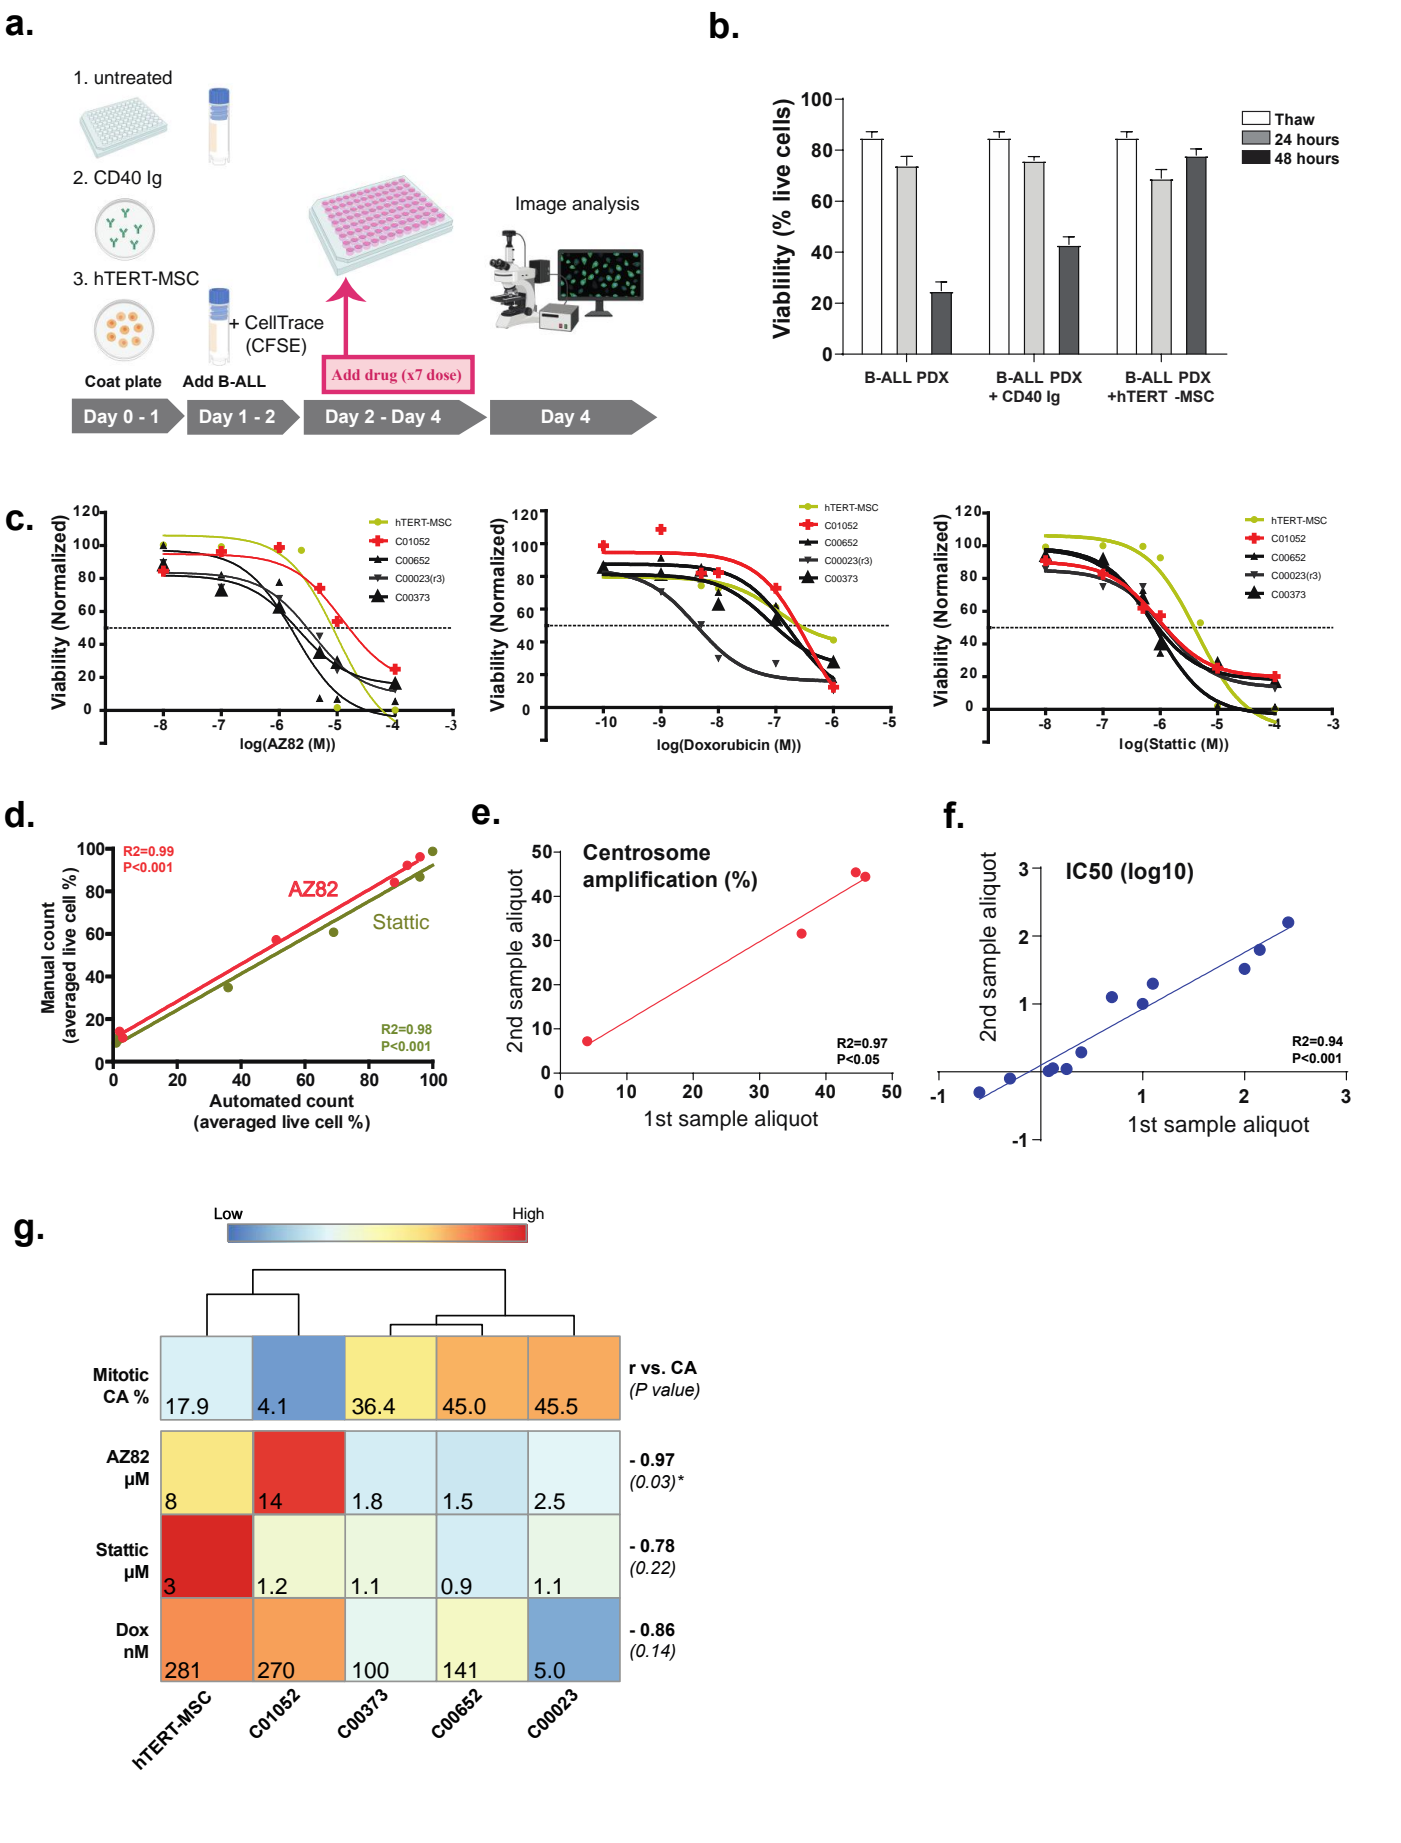

**Supplementary Figure S1** Optimization of *ex vivo* primary cell culture and drug testing **a.** Workflow schematic for *ex vivo* primary cell culture optimization. Conditions of co-culture were: 1. Control untreated. 2. CD40 Ig co-culture. 3. hTERT-MSC co-culture. B-ALL cells were stained with Cell Trace Violet (CFSE) prior to co-culture to ensure distinction from hTERT-MSCs during image analysis. Image created in Biorender.com **b.** Viability of B-ALL patient derived xenograft (PDX) sample cultured in three different conditions (Untreated, CD40 Ig co-culture, hTERT-MSC co-culture). Viability was measured after 0, 24, and 48 hours of culture. **c.** Cell viability normalized to DMSO control in hTERT-MSCs (green), primary bone marrow stem cells control (red), and 3 primary B-ALL samples (black) treated for 48 hours with serial dilutions of centrosome clustering inhibitors (AZ82, Stattic) or a chemotherapy (Doxorubicin). IC50 value is indicated by the dashed line. (mean  $\pm$  SEM,  $n=3$  experiments). **d.** Correlation of cell viability measured by high-content image analysis and manual cell counting in AZ82-treated ( $r^2=0.99$ ,  $p<0.001$ ) and Stattic-treated ( $R^2=0.98$ ,  $P<0.001$ ) primary B-ALL cells. **e.** Correlation of biological replicate measurements of centrosome amplification in distinct aliquots from three primary human B-ALL patients and one bone marrow stem cell control ( $R^2=0.97$ ,  $p<0.05$ ). **f.** Correlation of biological replicate measurements of IC50 concentrations ( $\log_{10} \mu\text{M}$ ) for AZ82 and Doxorubicin-treated primary B-ALL cells ( $R^2=0.94$ ,  $p<0.001$ ). **g.** Correlation between %CA and IC50 from AZ82, Stattic, or Doxorubicin for 4 primary B-ALL samples and 1 primary bone marrow stem cell sample, and hTERT-MSC cell line. Heatmap columns are ordered by hierarchical clustering based on average linkage, and rows are scaled by Z-score. Pearson  $r$  (vs. CA) values (bold) and the  $p$ -value (in parentheses) are on the right side ( $*p<0.05$ ).

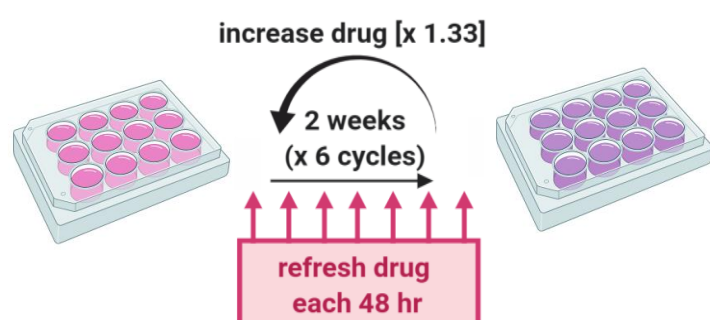

**Supplementary Figure S2.** Workflow schematic depicting *in vitro* generation of resistant 289 B-ALL cells. 289 cells received increasing concentrations ( $\times 1.33$  every 2 weeks) of either DMSO or of AZ82 over 4 months. Image created in Biorender.com.
